# Supplementary material
Source: PubMed Central journal article supplement (PMC4713339)

Cambuli et al., Figure S1

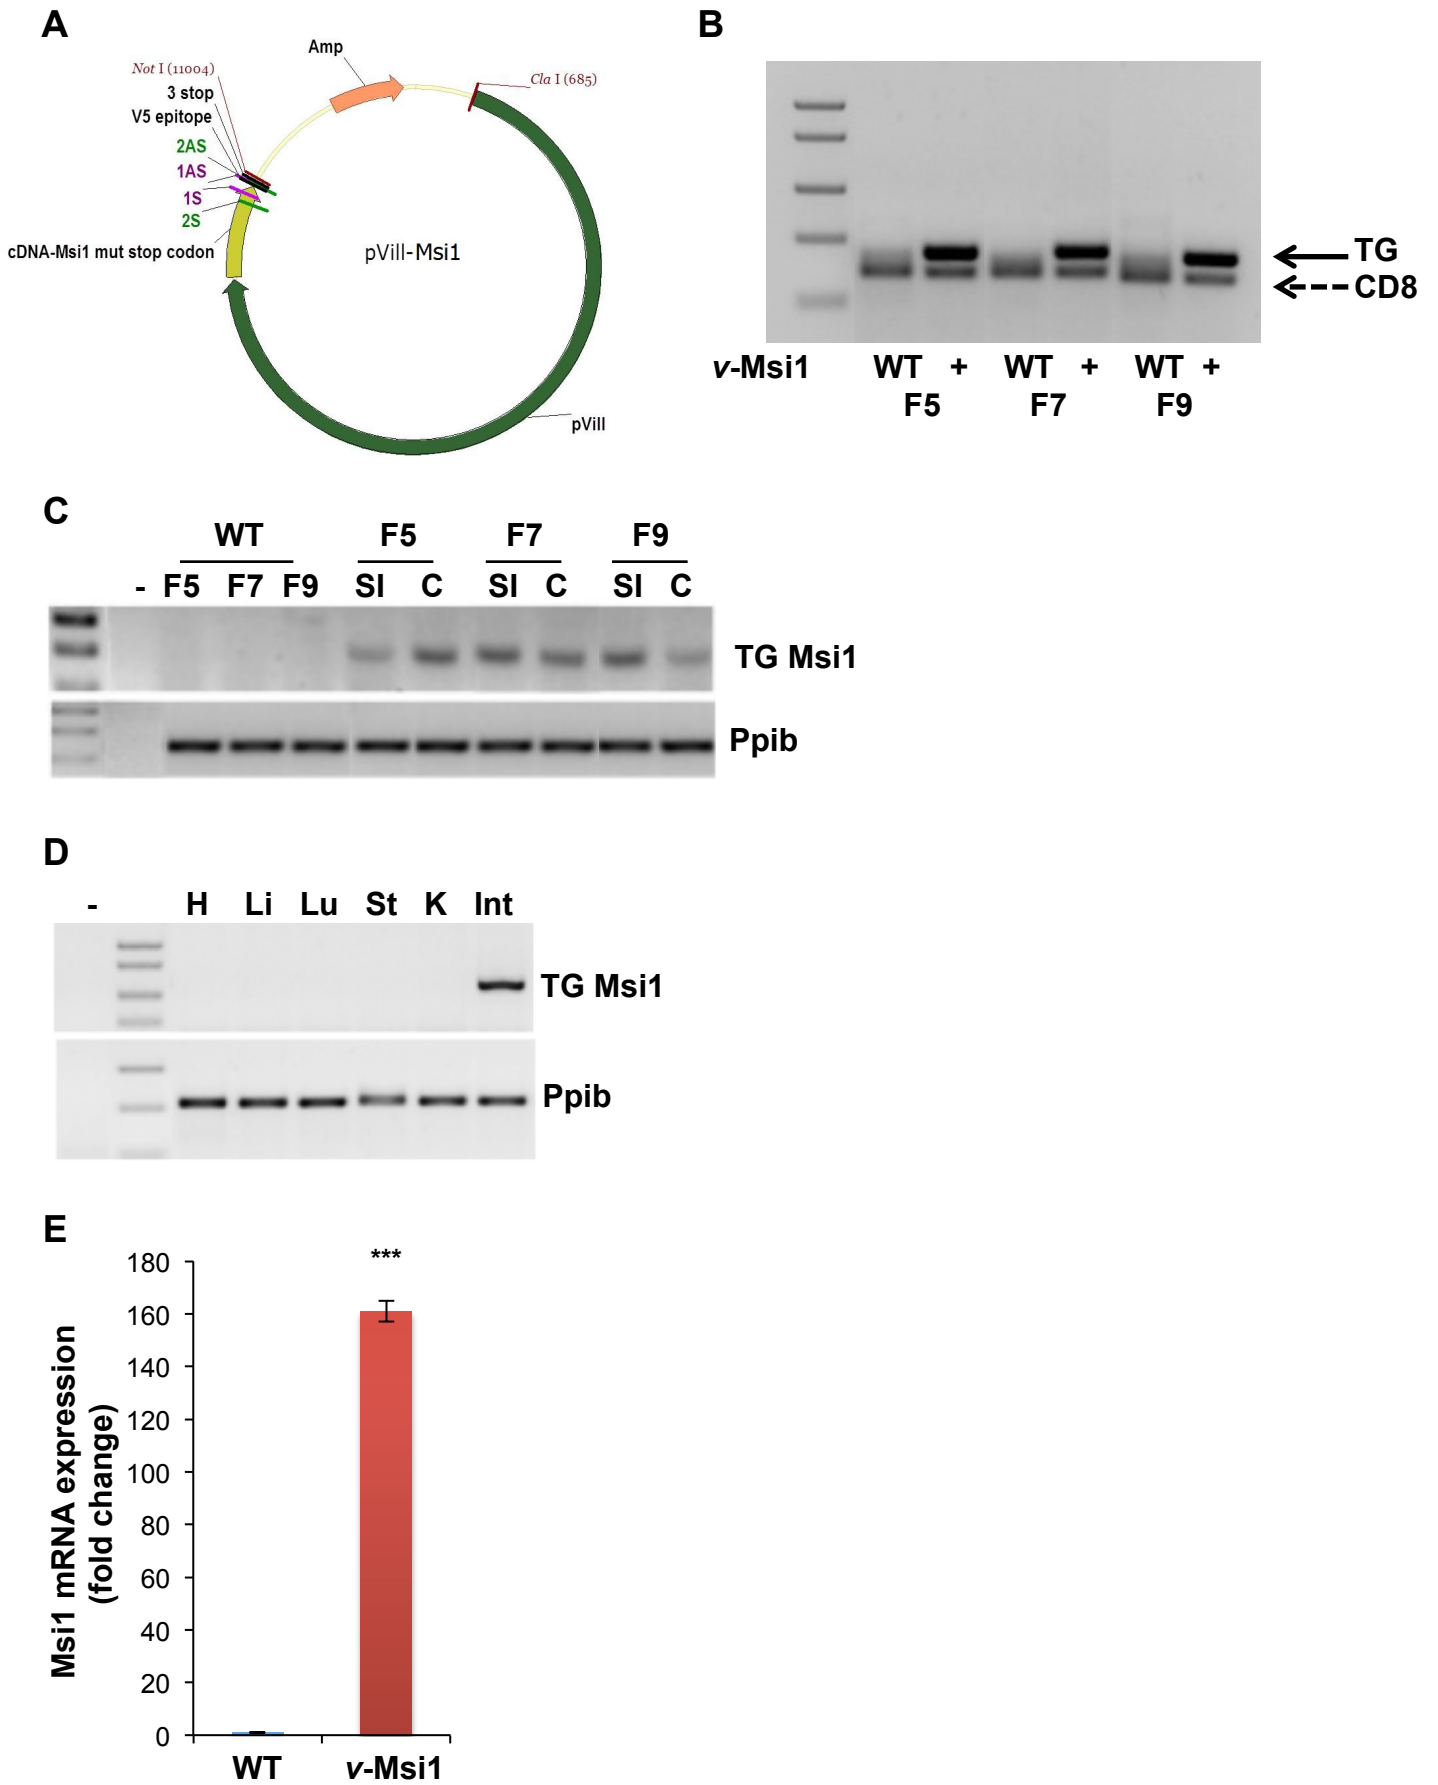

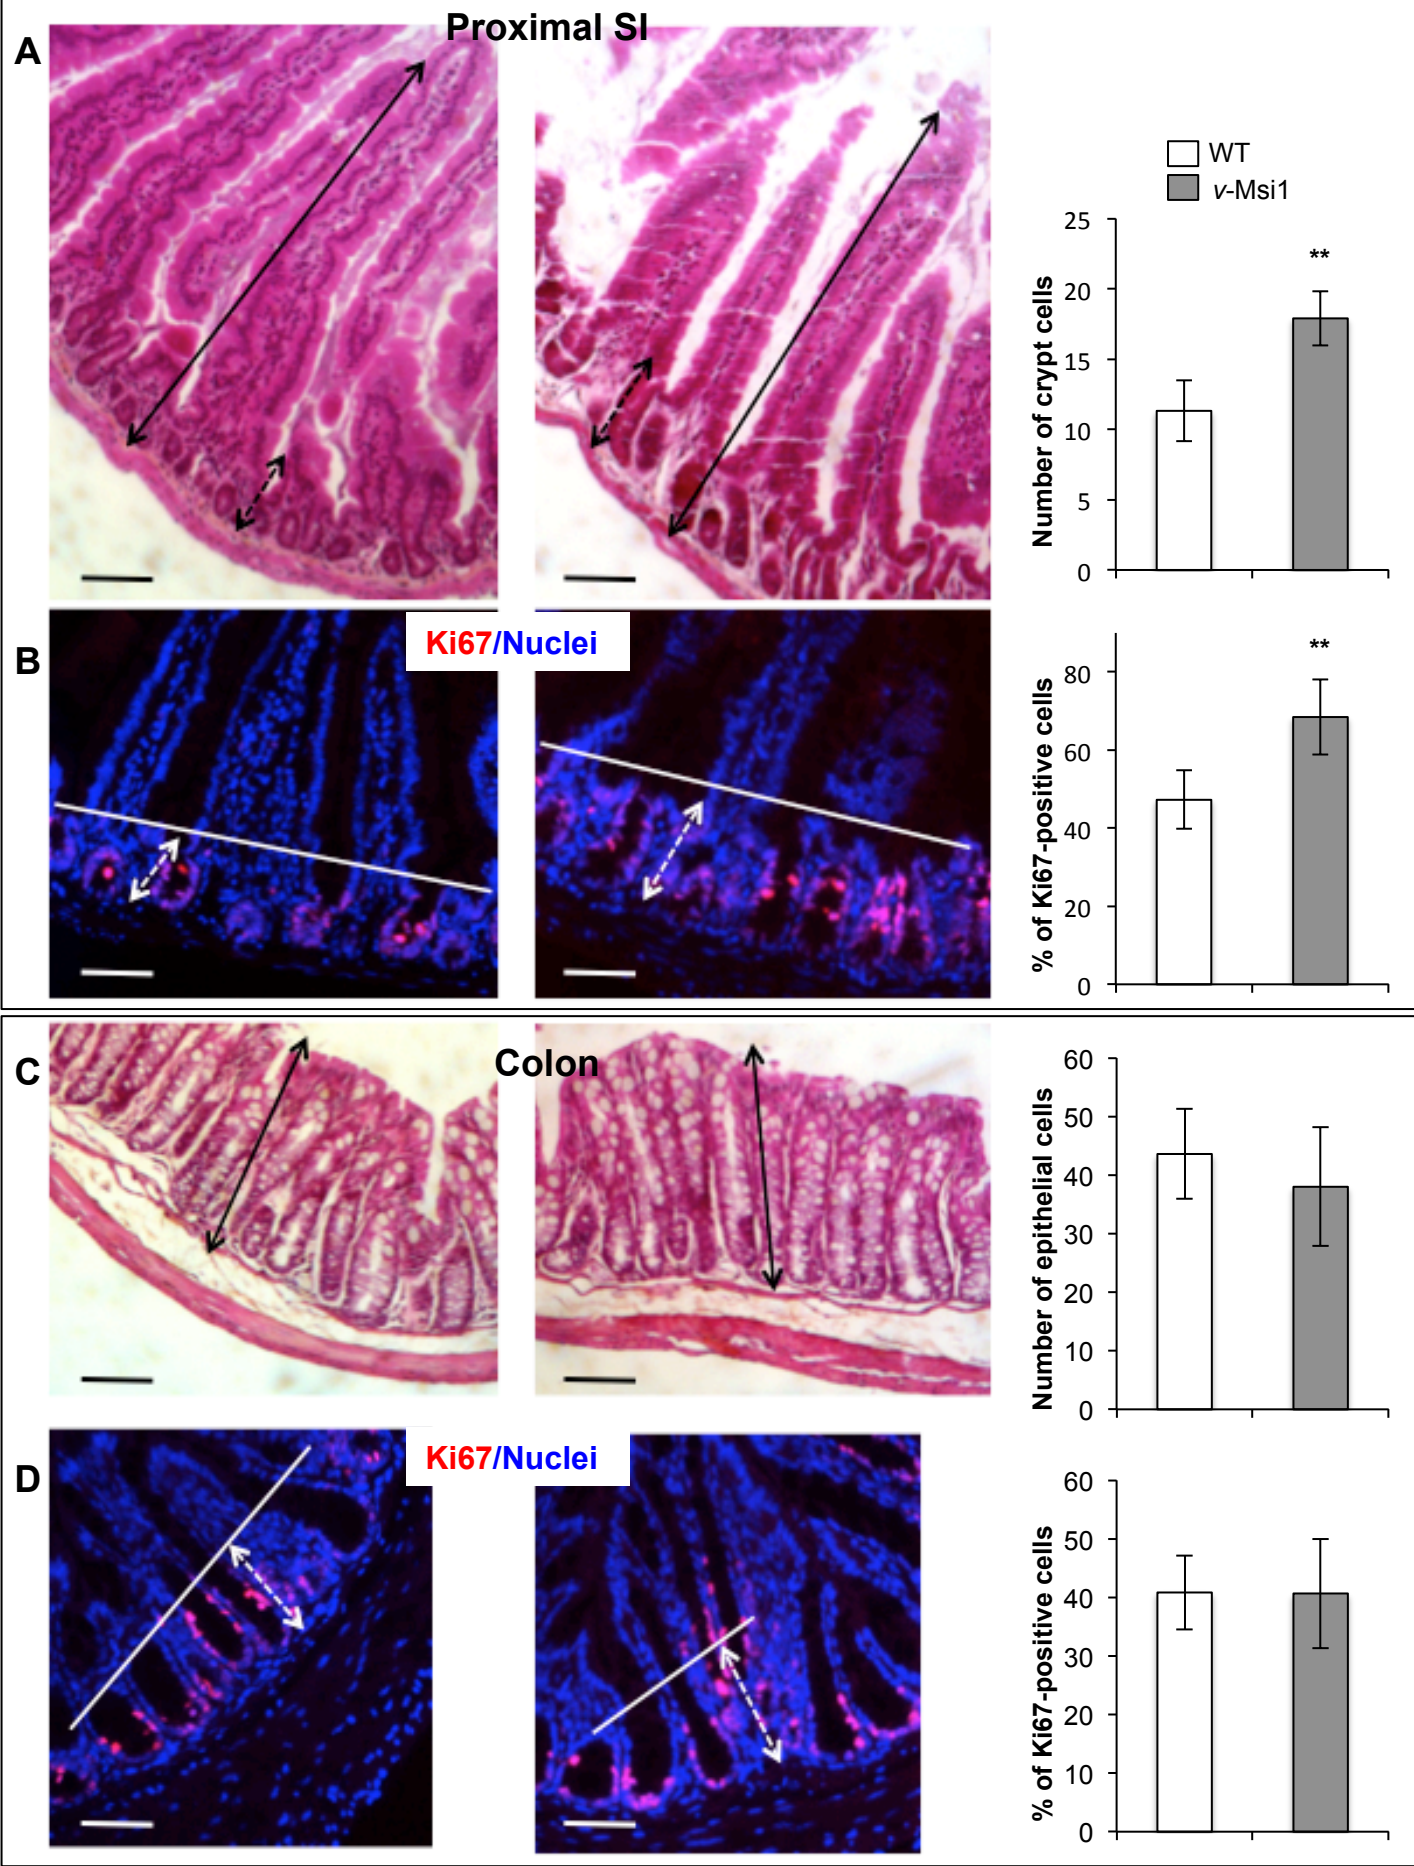

Cambuli et al., Figure S3

**A**

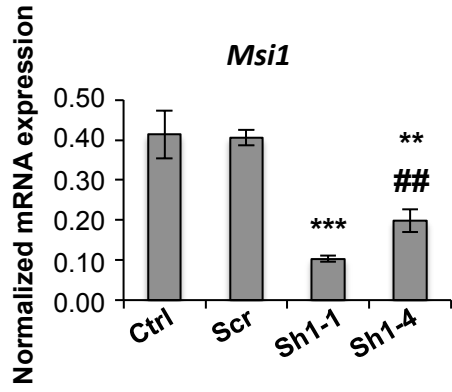

**B**

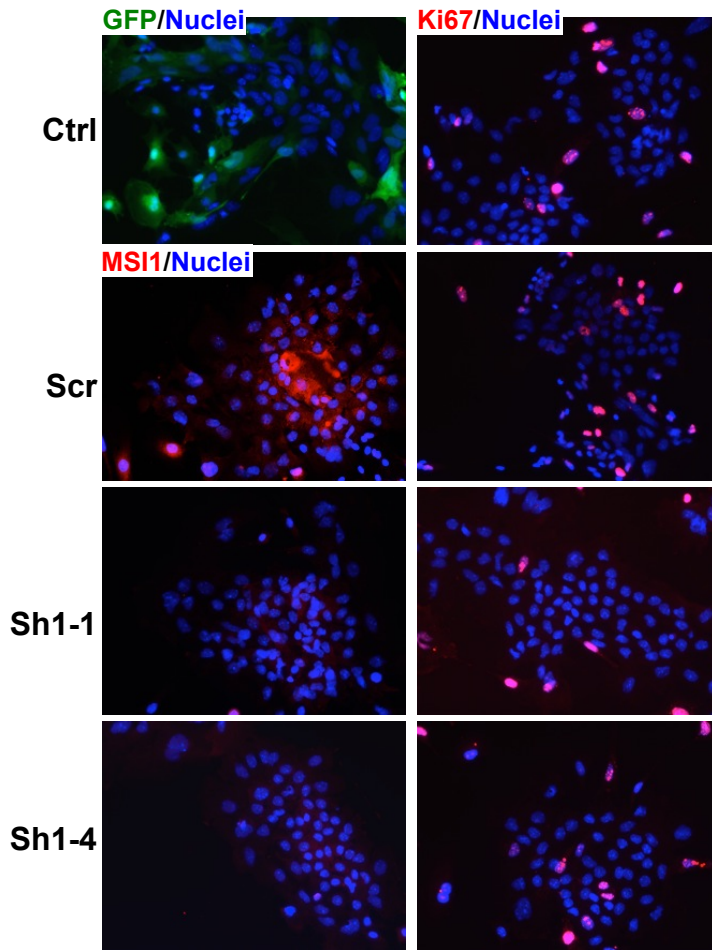

**C**

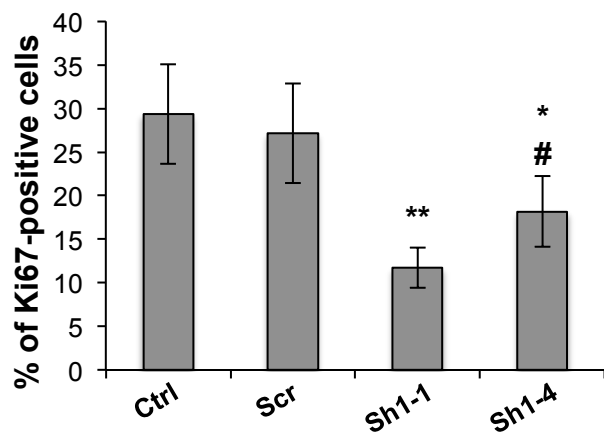

A

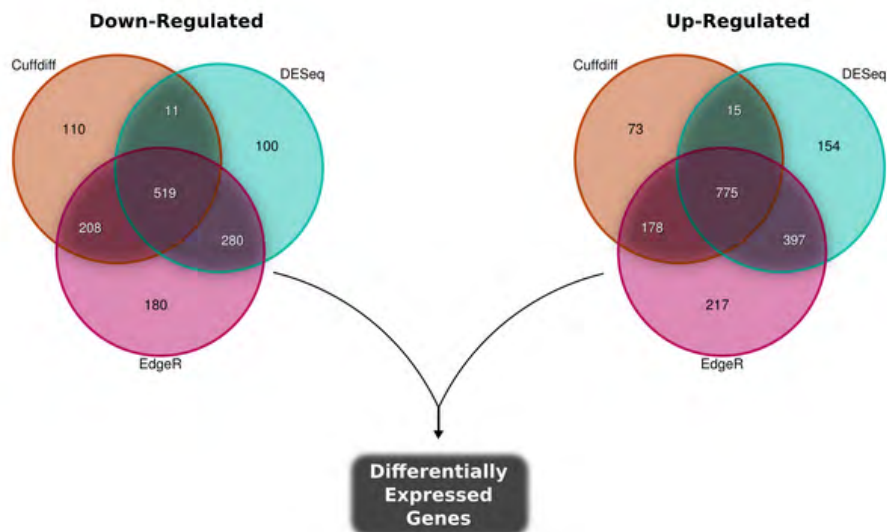

B

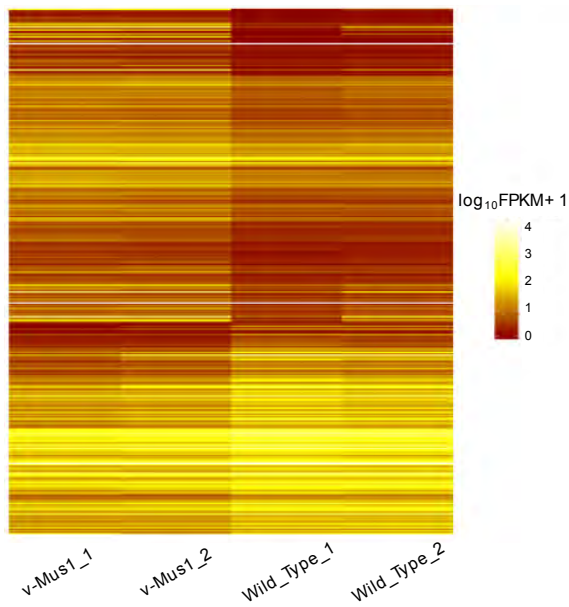

C

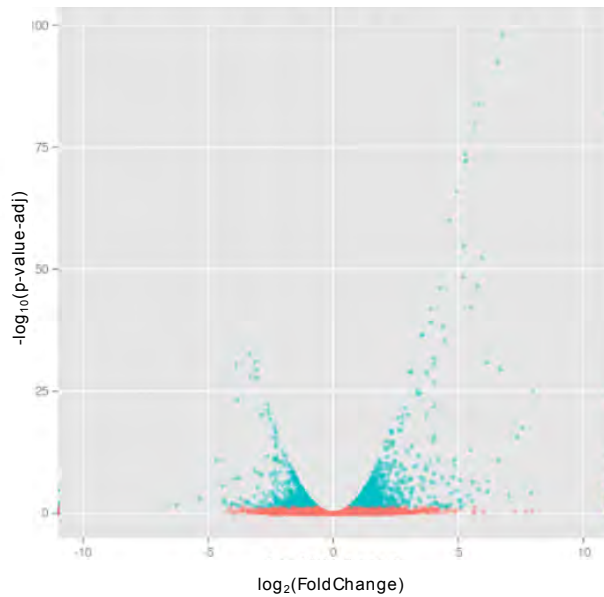





**A**

**Wnt Signaling Pathway - KEGG: mmu04310**

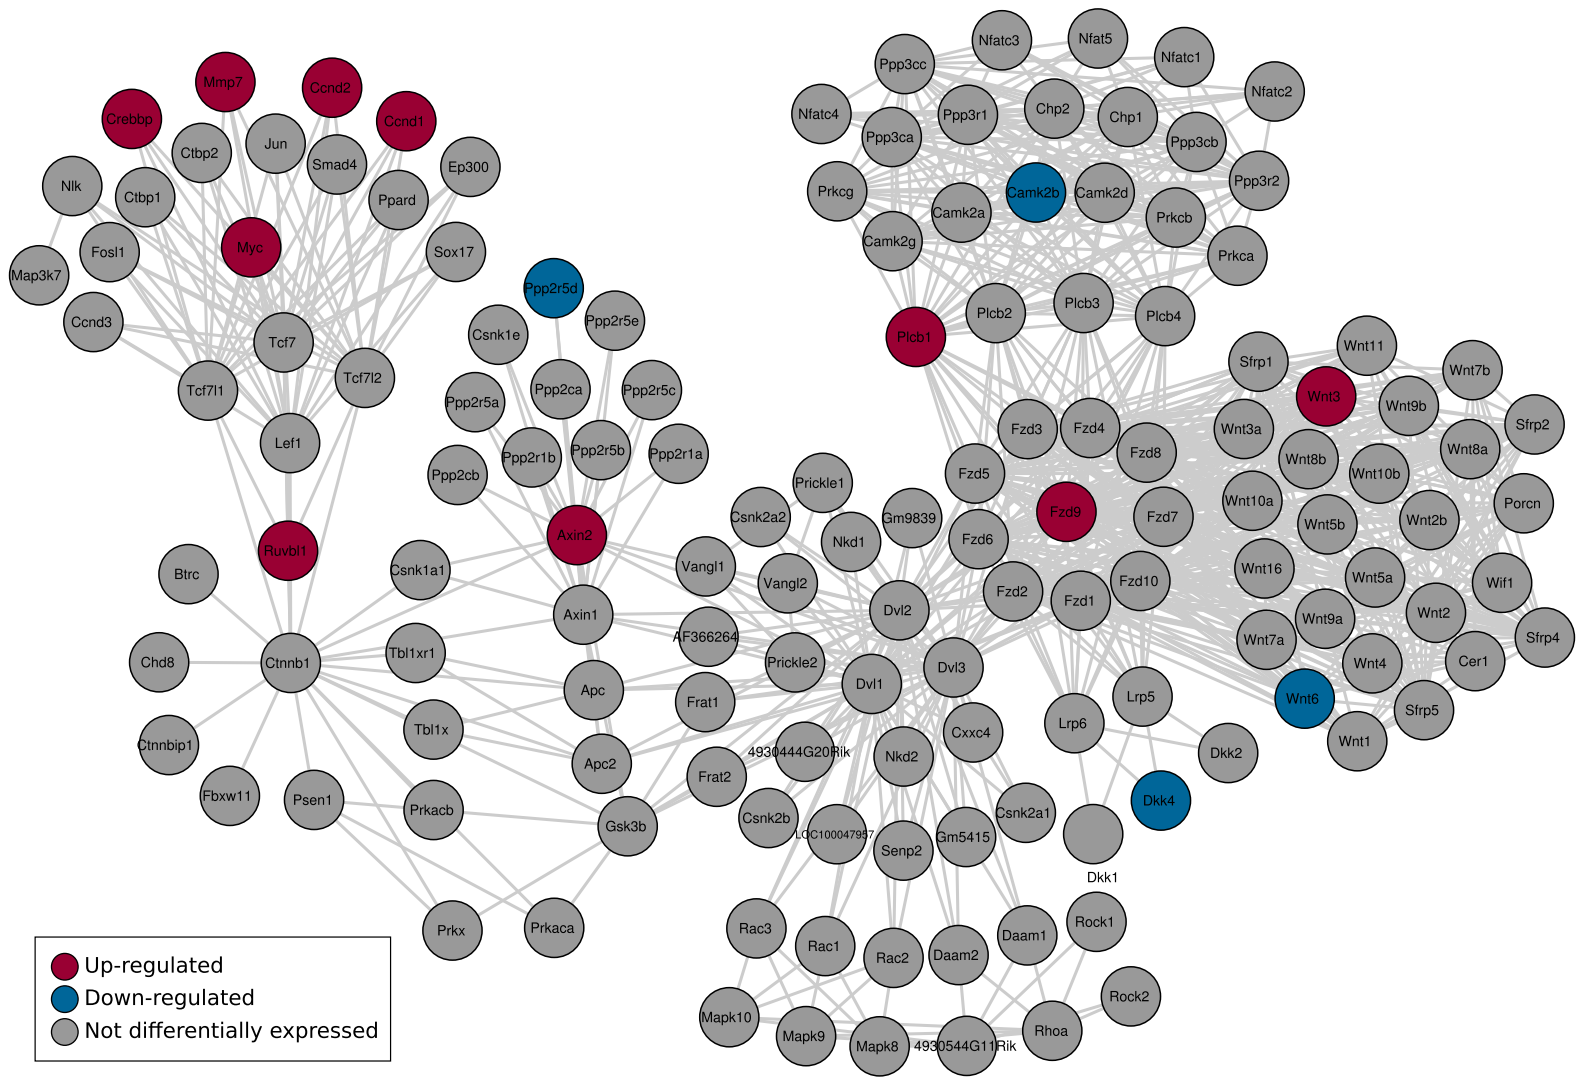

**B**

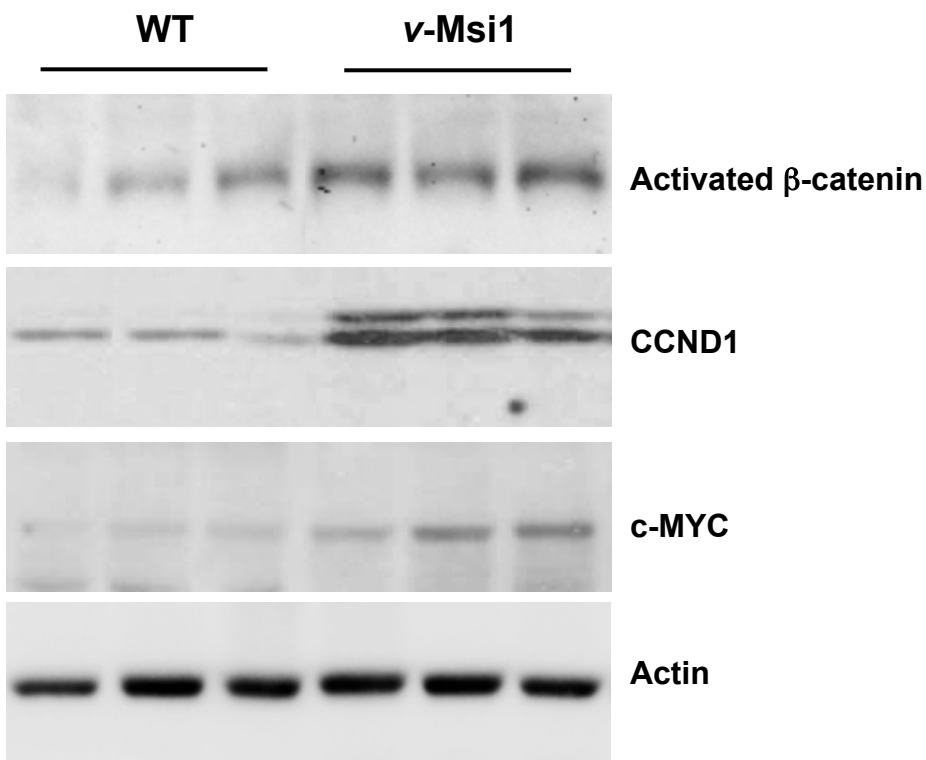

Cambuli et al., Figure S8

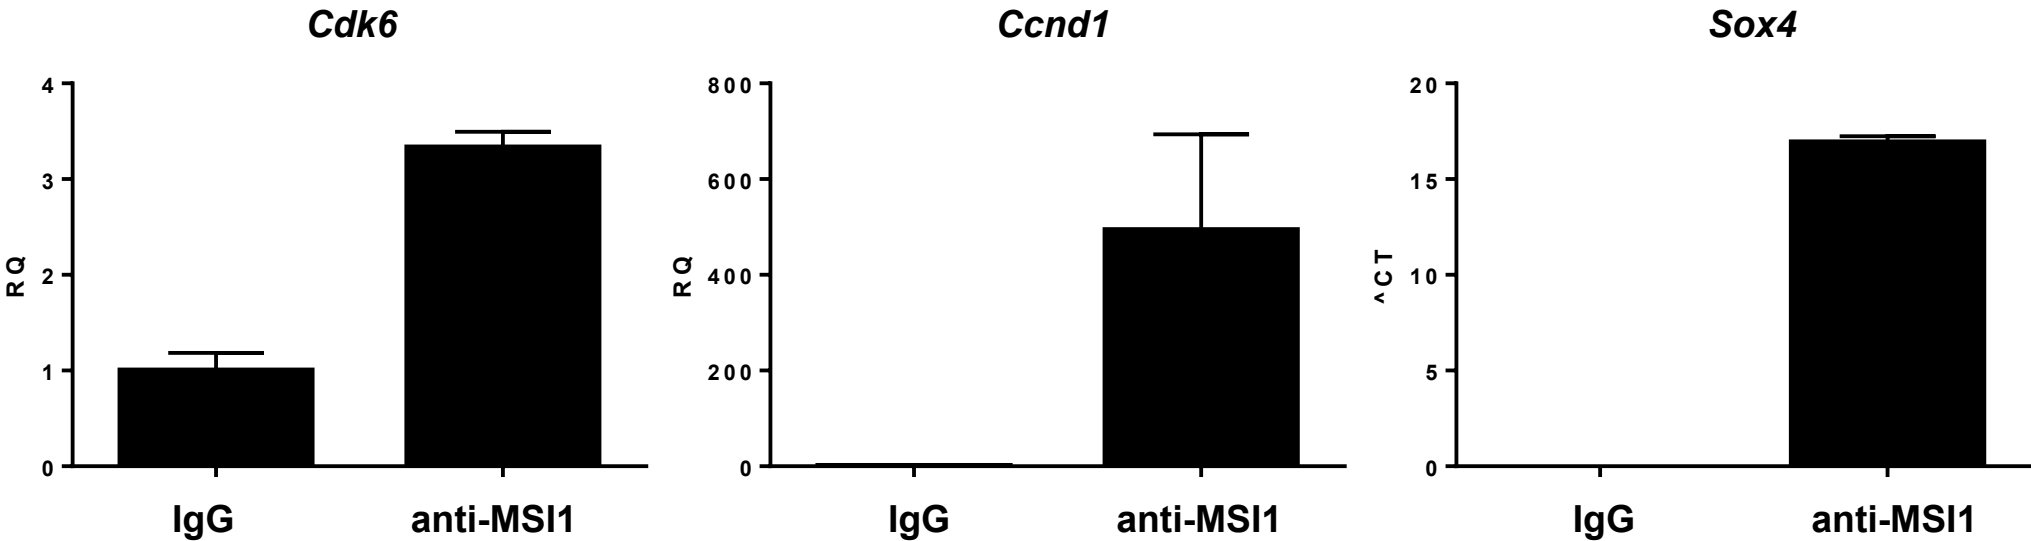



**A**

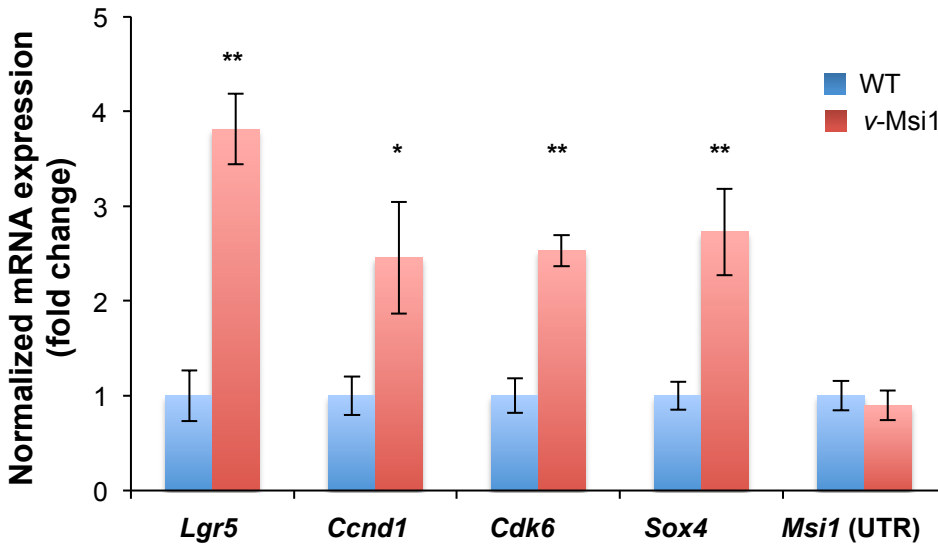

**B** Intestinal epithelium primary cultures

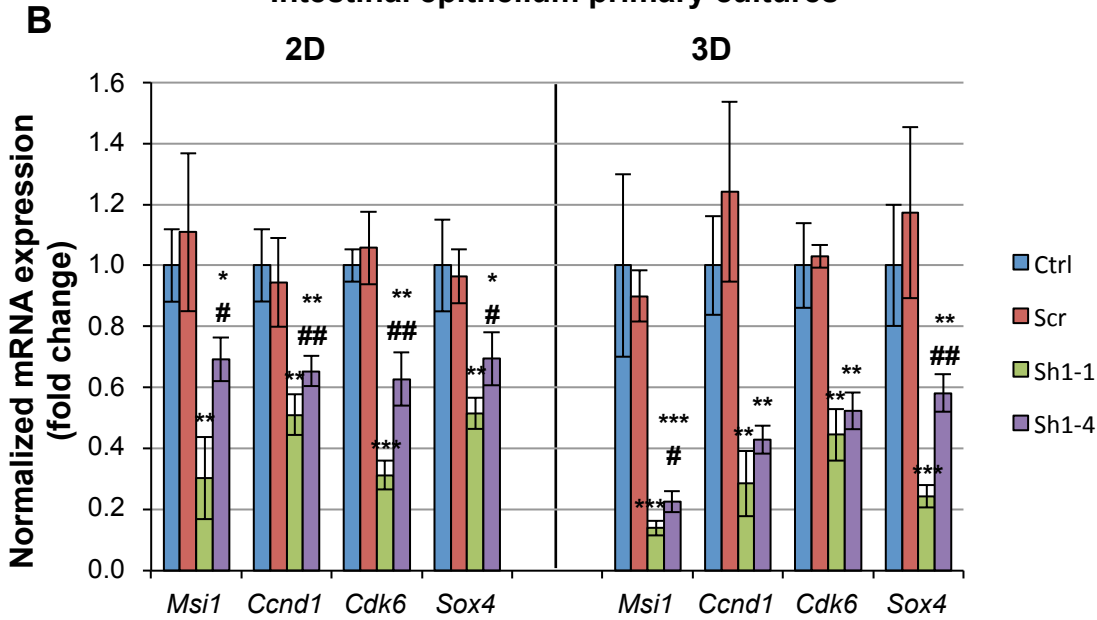

**C**

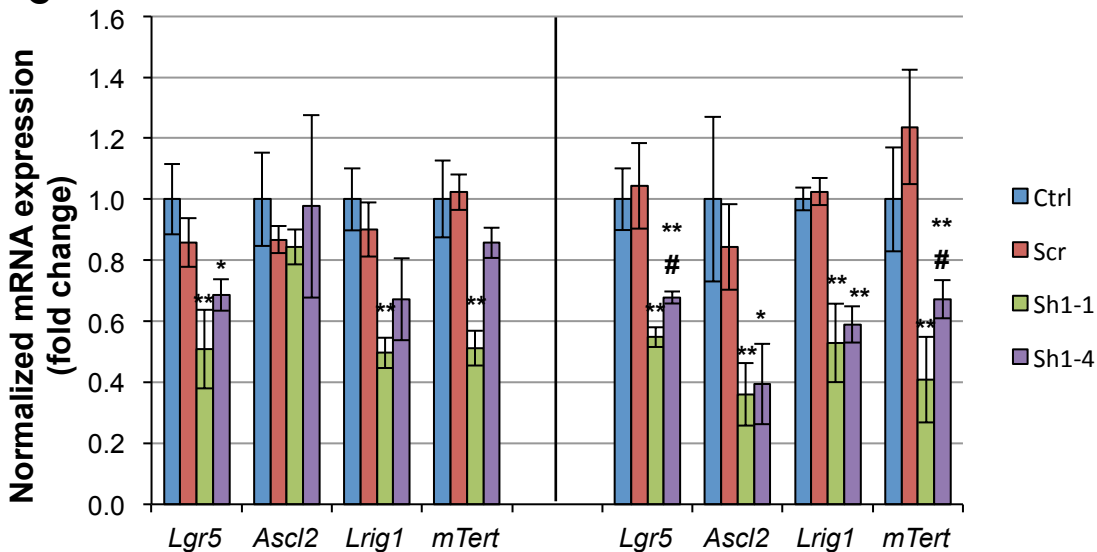

Cambuli et al., Figure S10

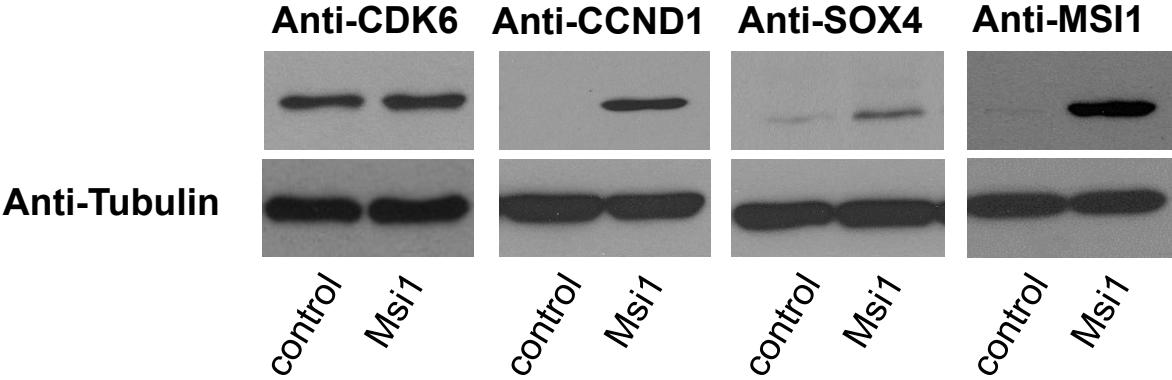

Supplement: NIHMS717026-supplement-Supp_FigureS1-S3___TableS1-S10.pdf [file NIHMS717026-supplement-Supp_FigureS1-S3___TableS1-S10.pdf]
